# Supplementary material
Source: HighWire-hosted journal article supplement (https://jnm.snmjournals.org/highwire/filestream/94203/field_highwire_adjunct_files/0/jnm083949_Supplemental_Figure.pdf)
Supplement: jnm083949_Supplemental_Figure.pdf [file jnm083949_Supplemental_Figure.pdf]

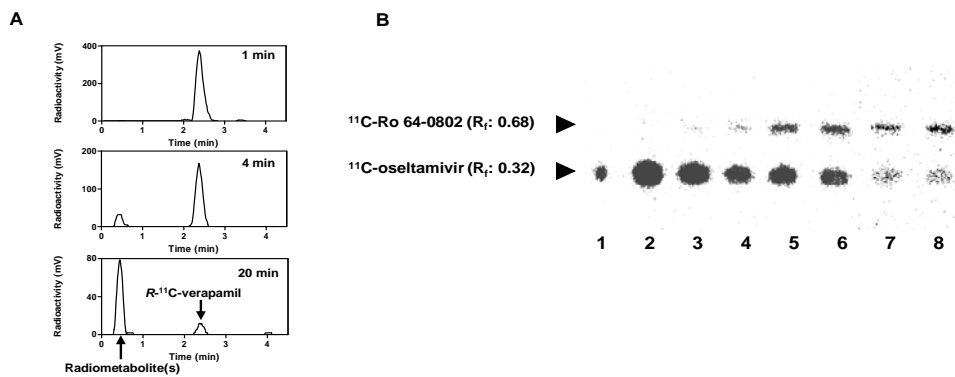

**SUPPLEMENTAL FIGURE 1.** (A) Representative radiochromatograms of monkey blood samples at 1, 4, and 20 min following drug administration. Intact  $R$ - $^{11}\text{C}$ verapamil was detected at approximately 2.4 min. The major metabolite was observed in the polar fraction at approximately 0.5 min. (B) TLC autoradiograms of monkey blood extracts 1 min (lane 2), 4 min (lane 3), 10 min (lane 4), 20 min (lane 5), 30 min (lane 6), 45 min (lane 7), and 60 min (lane 8) following administration of  $^{11}\text{C}$ oseltamivir. Lane 1 represents pure  $^{11}\text{C}$ oseltamivir as an authentic standard.
